# Supplementary material for: Following Tetraploidy in Maize, a Short Deletion Mechanism Removed Genes Preferentially from One of the Two Homeologs
Source: PLOS journal article supplement (doi:10.1371/journal.pbio.1000409), 2010-06-29

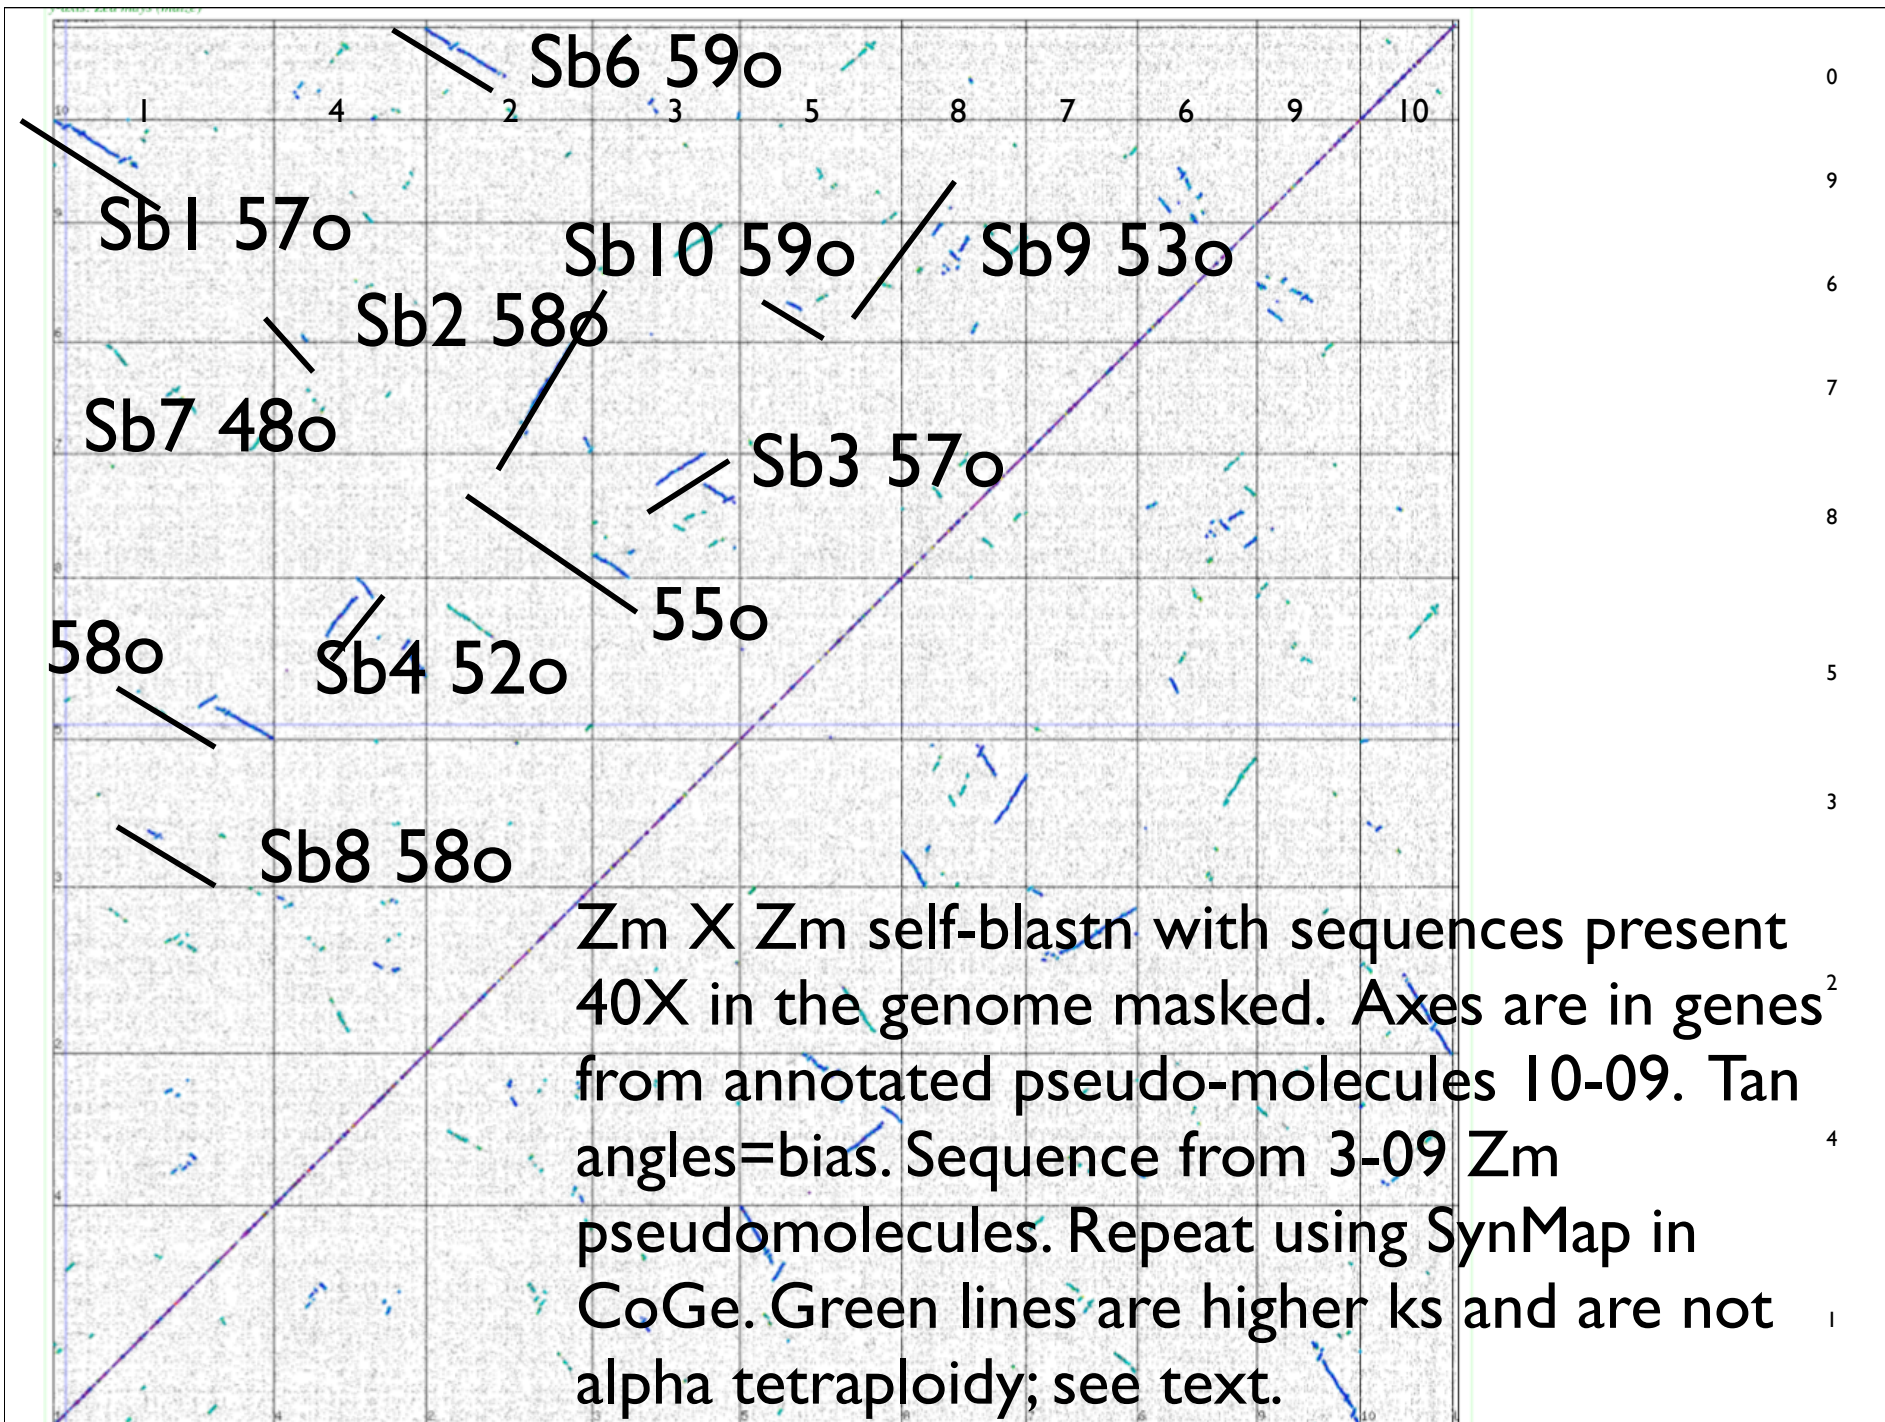



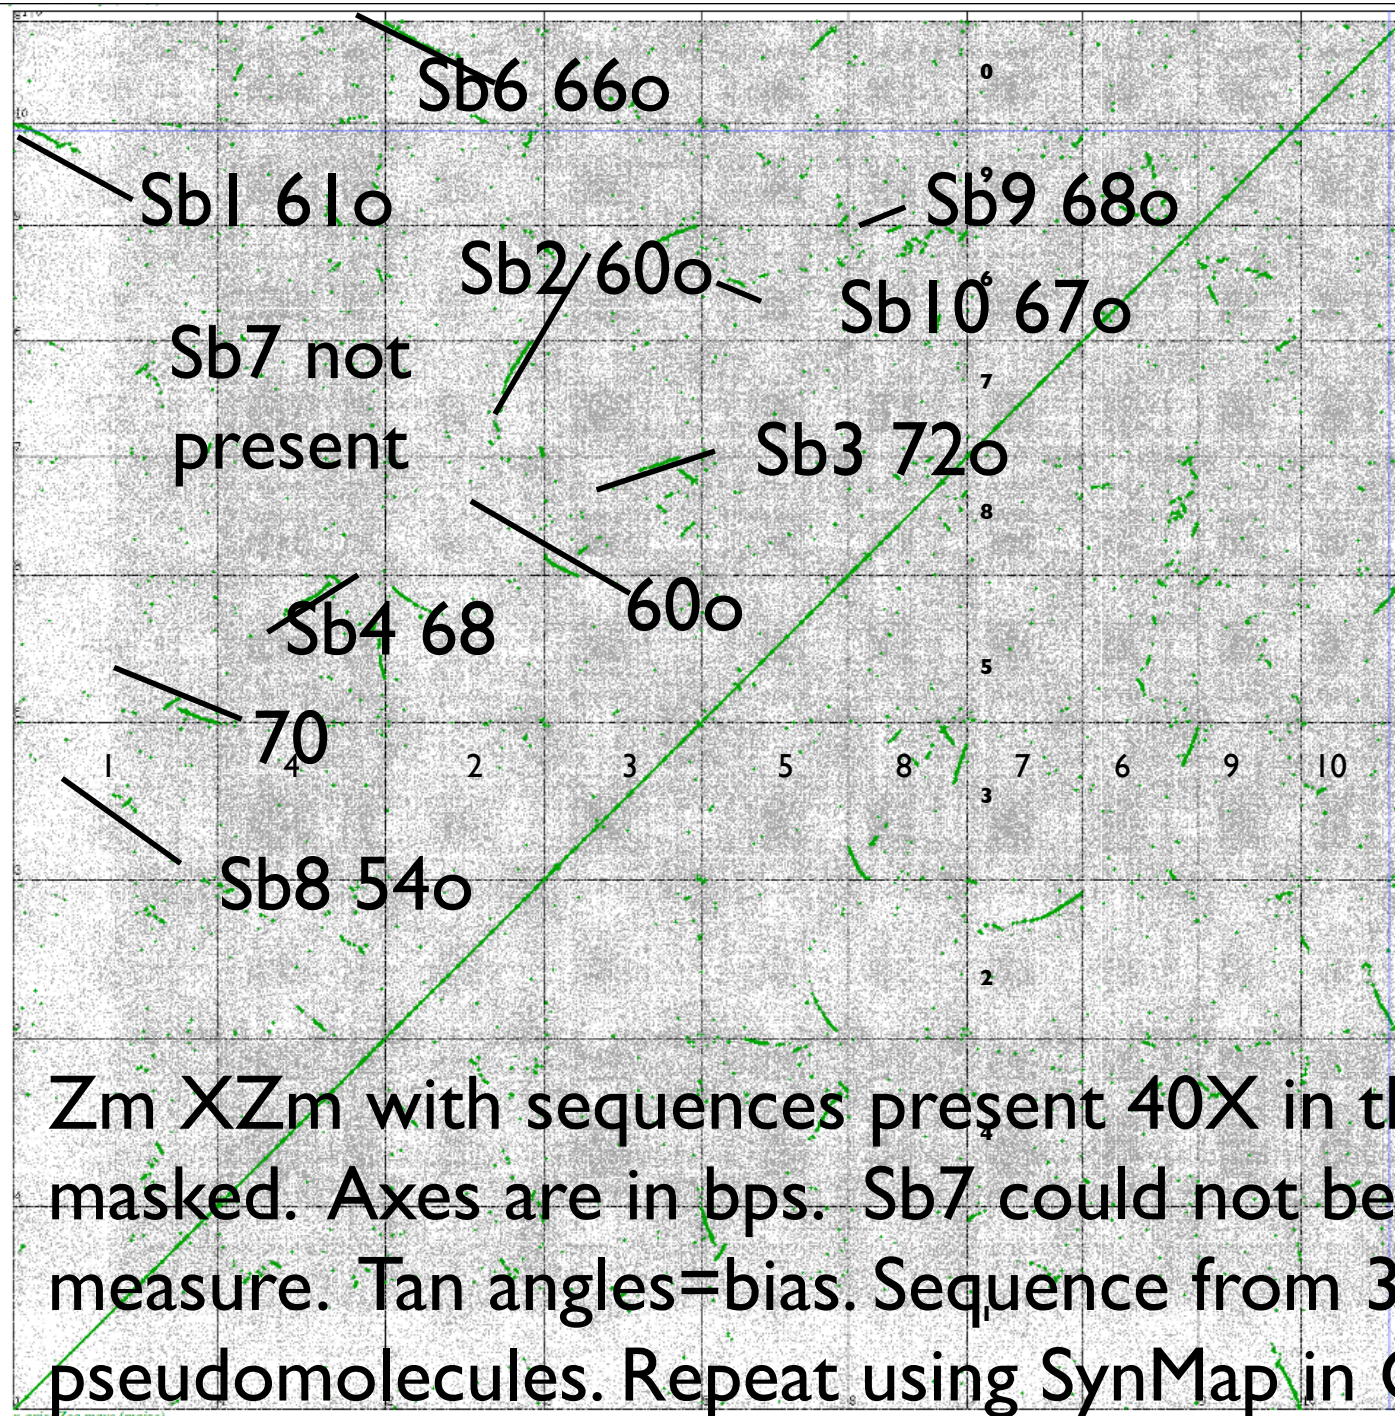

Supplement: S4 (10.1371/journal.pbio.1000409.s004) [file journal.pbio.1000409.s004]
